# Supplementary material for: Treatment timing and the effects of rhythm control strategy in patients with atrial fibrillation: nationwide cohort study
Source: PubMed Central journal article supplement — BMJ. 2021 May 11;373:n991. doi: 10.1136/bmj.n991 (PMC8111568; doi:10.1136/bmj.n991), 2021-05-11
Supplement: kimd063491.ww.pdf [file kimd063491.ww.pdf]

## SUPPLEMENTARY MATERIAL

### *Treatment timing and the effects of rhythm control strategy in patients with atrial fibrillation : nationwide cohort study*

Daehoon Kim, MD; Pil-Sung Yang, MD; Seng Chan You, MD, MS; Jung-Hoon Sung, MD; Eunsun Jang, MS;  
Hee Tae Yu, MD; Tae-Hoon Kim, MD; Hui-Nam Pak, MD; Moon-Hyoung Lee, MD; Gregory Y.H. Lip, MD;  
Boyoun Jeong, MD

| Contents                                                                                                                                                                                                                                       | Page  |
|------------------------------------------------------------------------------------------------------------------------------------------------------------------------------------------------------------------------------------------------|-------|
| <b>Supplementary Table 1.</b> Summary of strategies for emulating target trial.                                                                                                                                                                | 2-3   |
| <b>Supplementary Table 2.</b> Definitions and codes used for defining medical conditions, comorbidities, and drug treatments and procedures for atrial fibrillation.                                                                           | 4-5   |
| <b>Supplementary Table 3.</b> Definitions and codes used for study outcomes.                                                                                                                                                                   | 6     |
| <b>Supplementary Table 4.</b> Baseline characteristics after propensity score matching.                                                                                                                                                        | 7-8   |
| <b>Supplementary Table 5.</b> Definitions of 35 falsification endpoints.                                                                                                                                                                       | 9     |
| <b>Supplementary Table 6.</b> Baseline characteristics of patients undergoing early ( $\leq 1$ year) and late ( $> 1$ year) AF treatment.                                                                                                      | 10-11 |
| <b>Supplementary Table 7.</b> Baseline characteristics after overlap weighting.                                                                                                                                                                | 12-13 |
| <b>Supplementary Table 8.</b> Biological interactions.                                                                                                                                                                                         | 14    |
| <b>Supplementary Table 9.</b> Crossovers during follow-up.                                                                                                                                                                                     | 15    |
| <b>Supplementary Table 10.</b> Outcomes in weighted patients undergoing rhythm or rate control in on-treatment analyses in which patients were censored at the time of crossover between treatment modalities or discontinuation of treatment. | 16    |
| <b>Supplementary Table 11.</b> Outcomes in weighted patients undergoing rhythm or rate control in time-varying regression analyses which treatment was treated as a time-dependent variable.                                                   | 17    |
| <b>Supplementary Table 12.</b> Outcomes in propensity score matched patients undergoing rhythm or rate control.                                                                                                                                | 18    |
| <b>Supplementary Table 13.</b> Outcomes in weighted patients undergoing rhythm or rate control among those without prevalent heart failure, hypertension, or previous myocardial infarction.                                                   | 19    |
| <b>Supplementary Table 14.</b> Outcomes in weighted patients undergoing rhythm or rate control defined using a 30-day enroll period after the first prescription instead of the 180-day period in main analyses.                               | 20    |
| <b>Supplementary Table 15.</b> Risk of composite outcome not including hospitalisation for heart failure in weighted patients undergoing rhythm or rate control.                                                                               | 21    |
| <b>Supplementary Table 16.</b> Risk of 35 falsification endpoints in weighted patients undergoing rhythm control compared with rate control.                                                                                                   | 22    |
| <b>Supplementary Table 17.</b> Cumulative duration of treatment for patients initiating rhythm- or rate-control treatments.                                                                                                                    | 23    |
| <b>Supplementary Table 18.</b> Primary composite outcome associated with cumulative exposure to antiarrhythmic drugs (AADs).                                                                                                                   | 24    |
| <b>Supplementary Figure 1.</b> Distributions of the propensity scores before and after overlap weighting in (A) early and (B) late treatment populations.                                                                                      | 25    |
| <b>Supplementary Figure 2.</b> Schematic diagram showing the analytical approach used in this study.                                                                                                                                           | 26    |
| <b>Supplementary Figure 3.</b> Risk of 35 falsification endpoints in weighted patients undergoing rhythm or rate control.                                                                                                                      | 27    |

**Supplementary Table 1.** Summary of strategies for emulating target trial.

| Components           | Target trial (EAST-AFNET4)                                                                                                                                                                                                                                                                                                                                                                                                                                                                        | This study                                                                                                                                                                                                                                                                                                                                                                                                                                                                                                                                                                                                                                                                                                                                                                                                                                                                                                |
|----------------------|---------------------------------------------------------------------------------------------------------------------------------------------------------------------------------------------------------------------------------------------------------------------------------------------------------------------------------------------------------------------------------------------------------------------------------------------------------------------------------------------------|-----------------------------------------------------------------------------------------------------------------------------------------------------------------------------------------------------------------------------------------------------------------------------------------------------------------------------------------------------------------------------------------------------------------------------------------------------------------------------------------------------------------------------------------------------------------------------------------------------------------------------------------------------------------------------------------------------------------------------------------------------------------------------------------------------------------------------------------------------------------------------------------------------------|
| Inclusion period     | 28 July 2011 – 30 December 2016                                                                                                                                                                                                                                                                                                                                                                                                                                                                   | 28 July 2011 – 31 December 2015                                                                                                                                                                                                                                                                                                                                                                                                                                                                                                                                                                                                                                                                                                                                                                                                                                                                           |
| Eligibility criteria | <ol style="list-style-type: none"> <li>1) Adults (<math>\geq 18</math> years of age) who were older than 75 years of age, had had a previous transient ischaemic attack or stroke, or met two of the following criteria: age greater than 65 years, female sex, heart failure, hypertension, diabetes mellitus, severe coronary artery disease, chronic kidney disease, and left ventricular hypertrophy</li> <li>2) Early AF (diagnosed <math>\leq 12</math> months before enrolment)</li> </ol> | <ol style="list-style-type: none"> <li>1) Selected adults (<math>\geq 18</math> years of age) that received a rhythm-control or rate-control treatments and have no prior history of prescriptions and no records of ablation in the database who were older than 75 years of age, had a previous transient ischaemic attack or stroke, or met two of the following criteria: age greater than 65 years, female sex, heart failure, hypertension, diabetes mellitus, myocardial infarction, and chronic kidney disease</li> <li>2) Early AF (defined as AF diagnosed <math>\leq 12</math> months before enrolment) and late AF (diagnosed <math>&gt; 12</math> months before enrolment)</li> <li>3) Undergoing oral anticoagulation (<math>&gt; 90</math> days of supply within 180 days after their first recorded prescription of rhythm- or rate-control medications or ablation procedure)</li> </ol> |
| Exposed group        | Rhythm control: AADs, AF ablation, cardioversion of persistent AF, to be initiated early after randomization                                                                                                                                                                                                                                                                                                                                                                                      | Rhythm control: a prescription of more than a 90-day supply of any rhythm-control drugs in the 180-day period since the first prescription or the performance of an ablation procedure for AF.                                                                                                                                                                                                                                                                                                                                                                                                                                                                                                                                                                                                                                                                                                            |
| Unexposed group      | Usual care: initially treated with rate-control therapy without rhythm-control therapy                                                                                                                                                                                                                                                                                                                                                                                                            | <p>Rate control: a prescription of more than a 90-day supply of any rate-control drugs in the 180-day period since the first prescription and with no prescription of rhythm-control drug and no ablation within this period.</p> <p>Patients prescribed rhythm-control drugs for more than 90 days or who underwent ablation within the 180-day period since the initiation of rate-control drugs were classified as intention-to-treat with rhythm control.</p>                                                                                                                                                                                                                                                                                                                                                                                                                                         |
| Primary outcome      | <ol style="list-style-type: none"> <li>1) A composite of death from cardiovascular causes, stroke, or hospitalisation with worsening of heart failure or acute coronary syndrome</li> <li>2) The number of nights spent in the hospital per year.</li> </ol>                                                                                                                                                                                                                                      | <ol style="list-style-type: none"> <li>1) A composite of death from cardiovascular causes, ischaemic stroke, hospitalisation for heart failure, or acute myocardial infarction</li> <li>2) The number of nights spent in the hospital per year.</li> </ol>                                                                                                                                                                                                                                                                                                                                                                                                                                                                                                                                                                                                                                                |
| Secondary outcome    | Each component of the primary outcome, rhythm, left ventricular function, quality of life, AF-related symptom                                                                                                                                                                                                                                                                                                                                                                                     | Each component of the primary outcome                                                                                                                                                                                                                                                                                                                                                                                                                                                                                                                                                                                                                                                                                                                                                                                                                                                                     |
| Safety outcome       | A composite of death from any cause, stroke, or pre-specified serious adverse events of special interest capturing                                                                                                                                                                                                                                                                                                                                                                                | A composite of death from any cause, intracranial or gastrointestinal bleeding requiring hospitalisation, or pre-specified                                                                                                                                                                                                                                                                                                                                                                                                                                                                                                                                                                                                                                                                                                                                                                                |

|           |                                                                                     |                                                                                                                                                                        |
|-----------|-------------------------------------------------------------------------------------|------------------------------------------------------------------------------------------------------------------------------------------------------------------------|
|           | complications of rhythm-control therapy                                             | serious adverse events of special interest capturing complications of rhythm-control therapy                                                                           |
| Follow-up | From randomization until the end of the trial, death, or withdrawal from the trial. | From 180 days after their first recorded prescription or procedure to avoid immortal time bias until the end of follow-up of the database (31 December 2016) or death. |

**Supplementary Table 2.** Definitions and codes used for defining medical conditions, comorbidities, and drug treatments and procedures for atrial fibrillation.

|                                       | <b>Definitions</b>                                                                                                                                  | <b>Codes or conditions</b>                                                                                                                                        |
|---------------------------------------|-----------------------------------------------------------------------------------------------------------------------------------------------------|-------------------------------------------------------------------------------------------------------------------------------------------------------------------|
| <b>Medical conditions</b>             |                                                                                                                                                     |                                                                                                                                                                   |
| Atrial fibrillation                   | Defined from diagnosis*                                                                                                                             | I48                                                                                                                                                               |
| Heart failure                         | Defined from diagnosis*                                                                                                                             | ICD-10: I11.0, I50, I97.1                                                                                                                                         |
| Heart failure admission history       | Defined from principal or first secondary admission diagnoses of heart failure                                                                      | ICD-10: I11.0, I50, I97.1                                                                                                                                         |
| Hypertension                          | Defined if fulfilling both diagnosis* and treatment within 90 days prior to the first recorded prescription or procedure for rhythm or rate control | ICD-10: I10, I11, I12, I13, I15<br>Treatment: prescription for at least one of all kinds of antihypertensive medication                                           |
| Diabetes mellitus                     | Defined if fulfilling both diagnosis* and treatment within 90 days prior to the first recorded prescription or procedure for rhythm or rate control | ICD-10: E10, E11, E12, E13, E14<br>Treatment: prescription for at least one of all kinds of oral antidiabetics or insulin                                         |
| Dyslipidaemia                         | Defined from diagnosis*                                                                                                                             | ICD-10: E78                                                                                                                                                       |
| Ischaemic stroke                      | Defined from diagnosis*                                                                                                                             | ICD-10: I63, I64                                                                                                                                                  |
| Transient ischaemic attack            | Defined from diagnosis*                                                                                                                             | ICD-10: G45                                                                                                                                                       |
| Intracranial bleeding                 | Defined from diagnosis*                                                                                                                             | ICD-10: I60, I61, I62                                                                                                                                             |
| Myocardial infarction                 | Defined from diagnosis*                                                                                                                             | ICD-10: I21, I22, I25.2                                                                                                                                           |
| Peripheral arterial disease           | Defined from diagnosis*                                                                                                                             | ICD-10: I70.0, I70.1, I70.2, I70.8, I70.9                                                                                                                         |
| Valvular heart disease                | Defined from diagnoses* mitral stenosis or claims for heart valve surgery                                                                           | ICD-10: I05.0, I05.2, I34.2, Z95.2-4<br>Claim for valve replacement or valvuloplasty: O1781, O1782, O1783, O1791, O1792, O1793, O1797, O1794, O1795, O1796, O1798 |
| Chronic kidney disease                | Defined from eGFR or diagnosis* (if laboratory value was not available, diagnosis code was used)                                                    | eGFR <60mL/min per 1.73 m <sup>2</sup><br>ICD-10: N18, N19                                                                                                        |
| Proteinuria                           | Defined from laboratory data (if laboratory value was not available, diagnosis code* was used)                                                      | Urine dipstick proteinuria 1+ or higher (ICD-10: N06, N391, N392, R80)                                                                                            |
| Hyperthyroidism                       | Defined from diagnosis*                                                                                                                             | ICD-10: E05                                                                                                                                                       |
| Hypothyroidism                        | Defined from diagnosis*                                                                                                                             | ICD-10: E03                                                                                                                                                       |
| Malignancy                            | Defined from diagnoses* of cancer (non-benign)                                                                                                      | ICD-10: C00-C97                                                                                                                                                   |
| Chronic obstructive pulmonary disease | Defined if fulfilling both diagnosis* and treatment within 90 days prior to the first recorded prescription or procedure for rhythm or rate control | ICD-10: J42, J43(except J43.0), J44<br>Treatment: SABA, SAMA, LABA, LAMA, ICS, ICS+LABA, or methylxanthine (>1 months).                                           |
| Chronic liver disease                 | Defined from diagnosis* of chronic liver disease, cirrhosis, and hepatitis                                                                          | ICD-10: B18, K70, K71, K72, K73, K74, K76.1                                                                                                                       |
| Hypertrophic                          | Defined from at least one                                                                                                                           | ICD-10: I42.1, I42.2                                                                                                                                              |

|                                                                          |                                                                            |                                                                                                                                                                                                                         |
|--------------------------------------------------------------------------|----------------------------------------------------------------------------|-------------------------------------------------------------------------------------------------------------------------------------------------------------------------------------------------------------------------|
| cardiomyopathy                                                           | records of either inpatient or outpatient diagnoses                        |                                                                                                                                                                                                                         |
| Osteoporosis                                                             | Defined from diagnosis*                                                    | ICD-10: M80, M81, M82 (except M82.0)                                                                                                                                                                                    |
| Sleep apnea                                                              | Defined from diagnosis*                                                    | ICD-10: G47.3                                                                                                                                                                                                           |
| <b>Drug treatment for atrial fibrillation (available in South Korea)</b> |                                                                            |                                                                                                                                                                                                                         |
| Anti-arrhythmic drug                                                     |                                                                            |                                                                                                                                                                                                                         |
| Class Ic                                                                 |                                                                            | flecainide, pilsicainide, propafenone                                                                                                                                                                                   |
| Class III                                                                |                                                                            | amiodarone, dronedarone, sotalol                                                                                                                                                                                        |
| Rate control drugs                                                       |                                                                            |                                                                                                                                                                                                                         |
| Beta-blocker                                                             |                                                                            | atenolol, bisoprolol, carvedilol, metoprol, nebivolol, propranolol, labetalol                                                                                                                                           |
| Calcium channel blocker                                                  |                                                                            | diltiazem, verapamil                                                                                                                                                                                                    |
| Cardiac glycosides                                                       |                                                                            | digoxin                                                                                                                                                                                                                 |
| <b>Procedures for atrial fibrillation</b>                                |                                                                            |                                                                                                                                                                                                                         |
| Catheter ablation for AF                                                 | Defined from admission diagnosis of AF plus claims for ablation procedures | ICD-10: I48<br>Claim codes: M6542 (Conventional Radiofrequency Ablation of Atrial fibrillation) or M6547 (Radiofrequency Ablation of Atrial fibrillation Through Intracardiac Electrophysiologic 3-Dimensional Mapping) |
| Cardioversion                                                            | Defined from diagnosis of AF plus claims for cardioversion                 | ICD-10: I48<br>Claim codes:M5880                                                                                                                                                                                        |

\*For greater accuracy, either one diagnosis during hospitalisation or more than twice at outpatient clinics was required for the diagnosis.

**Supplementary Table 3.** Definitions and codes used for study outcomes.

| Outcomes                                         | Definitions                                                                                                             | Codes or conditions                                                                  | PPV                   |
|--------------------------------------------------|-------------------------------------------------------------------------------------------------------------------------|--------------------------------------------------------------------------------------|-----------------------|
| <b>Primary composite outcomes</b>                |                                                                                                                         |                                                                                      |                       |
| Ischaemic stroke                                 | Defined from admission diagnosis with concomitant imaging studies of the brain or related death                         | ICD-10: I63, I64                                                                     | 90.6%*<br>(2347/2591) |
| Hospitalisation owing to heart failure           | Defined from principal or first secondary admission diagnoses of heart failure                                          | ICD-10: I11.0, I50, I97.1                                                            | 82.1%*<br>(110/134)   |
| Acute myocardial infarction                      | Defined from admission diagnosis of acute myocardial infarction concurrently with coronary angiography or related death | ICD-10: I21, I22                                                                     | 86.5%†<br>(4054/4688) |
| <b>Safety outcomes</b>                           |                                                                                                                         |                                                                                      |                       |
| Intracranial bleeding                            | Defined from admission diagnosis with concomitant imaging studies of the brain or related death                         | ICD-10: I60-I62                                                                      | 87.5%*<br>(286/327)   |
| Gastrointestinal bleeding                        | Defined from admission diagnosis or related death                                                                       | ICD-10: K25-28 (subcodes 0-2 and 4-6 only), K62.5, K92.0, K92.1, K92.2, I85.0, I98.3 | 92.0%‡<br>(184/200)   |
| Serious adverse events related to rhythm control |                                                                                                                         |                                                                                      |                       |
| Cardiac tamponade                                | Defined from claims for pericardiocentesis                                                                              | Claim codes: C8060, C8061                                                            | -                     |
| Syncope                                          | Defined from either one diagnosis during hospitalisation or more than twice at outpatient clinics                       | ICD-10: R55.x                                                                        | -                     |
| Sick sinus syndrome                              | Defined from either one diagnosis during hospitalisation or more than twice at outpatient clinics                       | ICD-10: I495.                                                                        | 91.1%*<br>(307/337)   |
| Atrioventricular block                           | Defined from either one diagnosis during hospitalisation or more than twice at outpatient clinics                       | ICD-10: I44.1, I44.2, I44.3, I45.3, I45.8, I45.9                                     | 95.7%*<br>(264/276)   |
| Pacemaker implantation                           | Defined from claims for pacemaker implantation                                                                          | Claim codes: O2003, O2004, O0203, O0204, O0205, O0206, O0207                         | -                     |
| Sudden cardiac arrest                            | Defined from admission diagnosis or related death§                                                                      | ICD-10: I46, I49.0                                                                   | 80.2%*<br>(586/731)   |

PPV was represented as % (number of true positive cases / number of examined cases).

\*We conducted a validation study using hospital administrative data from two tertiary hospitals.

†Validated in a study by Lee, HY. et al. (Atrial fibrillation and the risk of myocardial infarction: a nation-wide propensity-matched study. *Sci Rep* 2017;7(1):12716).

‡Validated in a study by Park, J. et al. (Validation of diagnostic codes of major clinical outcomes in a National Health Insurance database. *Int J Arrhythm* 2019;20:5).

§To avoid erroneous inclusion of the patients with non-cardiac arrest, we excluded the patient with sudden arrest diagnosis accompanied by respiratory arrest (R09.0, R09.2), gastrointestinal bleeding (I85.0, K25.0, K25.4, K26.0, K26.4, K27.0, K27.4, K92.0-K92.2), brain haemorrhage (I60.x-I62.x, S06.4-S06.6), septic shock (A41.9, R57.2), pregnancy and delivery (O00-O99), diabetic ketoacidosis (E14.1), anaphylaxis (T78.2), and accidents including suicide (T71, T75.1, T36-T65, V80-V89, W76.x, X60-X84).

\*Validated in a study by Kim, IJ. et al. (Relationship Between Anemia and the Risk of Sudden Cardiac Arrest - A Nationwide Cohort Study in South Korea. *Circ J* 2018;82(12):2962-9).

ICD-10, International Classification of Diseases-10th Revision; PPV, positive predictive value.

**Supplementary Table 4.** Baseline characteristics after propensity score matching.

| Variables                                    | After propensity score matching                    |                             |      |                                                   |                             |       |
|----------------------------------------------|----------------------------------------------------|-----------------------------|------|---------------------------------------------------|-----------------------------|-------|
|                                              | Early AF treatment<br>(≤1 year since AF diagnosis) |                             |      | Late AF treatment<br>(>1 year since AF diagnosis) |                             |       |
|                                              | Rhythm<br>Control<br>(N=3973)                      | Rate<br>Control<br>(N=3973) | ASD  | Rhythm<br>Control<br>(N=1351)                     | Rate<br>Control<br>(N=1351) | ASD   |
| <b>Sociodemographic</b>                      |                                                    |                             |      |                                                   |                             |       |
| Age, years                                   | 70 (62-77)                                         | 71 (62-77)                  | 1.1% | 71 (64-77)                                        | 71 (63-77)                  | 4.1%  |
| <65 years                                    | 1180 (29.7)                                        | 1160 (29.2)                 | 1.1% | 363 (26.9)                                        | 382 (28.3)                  | 3.1%  |
| 65-74 year                                   | 1455 (36.6)                                        | 1480 (37.3)                 | 1.3% | 506 (37.5)                                        | 516 (38.2)                  | 1.5%  |
| ≥75 years                                    | 1338 (33.7)                                        | 1333 (33.6)                 | 0.3% | 482 (35.7)                                        | 453 (33.5)                  | 4.5%  |
| Male                                         | 2127 (53.5)                                        | 2091 (52.6)                 | 1.8% | 773 (57.2)                                        | 795 (58.8)                  | 3.3%  |
| AF duration, months                          | 0.0 (0.0-0.8)                                      | 0.0 (0.0-0.4)               | 0.1% | 56.2 (29.5-97.2)                                  | 58.5 (28.7-96.9)            | 1.2%  |
| Enroll year                                  |                                                    |                             |      |                                                   |                             |       |
| 2011                                         | 246 (6.2)                                          | 231 (5.8)                   | 1.6% | 92 (6.8)                                          | 94 (7.0)                    | 0.6%  |
| 2012                                         | 672 (16.9)                                         | 678 (17.1)                  | 0.4% | 274 (20.3)                                        | 274 (20.3)                  | <0.1% |
| 2013                                         | 837 (21.1)                                         | 876 (22.0)                  | 2.4% | 292 (21.6)                                        | 295 (21.8)                  | 0.5%  |
| 2014                                         | 917 (23.1)                                         | 891 (22.4)                  | 1.6% | 313 (23.2)                                        | 313 (23.2)                  | <0.1% |
| 2015                                         | 1301 (32.7)                                        | 1297 (32.6)                 | 0.2% | 380 (28.1)                                        | 375 (27.8)                  | 0.8%  |
| High tertile of income                       | 1748 (44.0)                                        | 1757 (44.2)                 | 0.5% | 614 (45.4)                                        | 615 (45.5)                  | 0.1%  |
| Number of OPD visits ≥12/year                | 3185 (80.2)                                        | 3224 (81.1)                 | 2.5% | 1120 (82.9)                                       | 1128 (83.5)                 | 1.6%  |
| Living in metropolitan areas                 | 1774 (44.7)                                        | 1762 (44.3)                 | 0.6% | 587 (43.4)                                        | 594 (44.0)                  | 1.0%  |
| Level of care initiating treatment           |                                                    |                             |      |                                                   |                             |       |
| Tertiary                                     | 1926 (48.5)                                        | 1927 (48.5)                 | 0.1% | 648 (48.0)                                        | 656 (48.6)                  | 1.2%  |
| Secondary                                    | 1843 (46.4)                                        | 1836 (46.2)                 | 0.4% | 623 (46.1)                                        | 608 (45.0)                  | 2.2%  |
| Primary                                      | 204 (5.1)                                          | 210 (5.3)                   | 0.7% | 80 (5.9)                                          | 87 (6.4)                    | 2.2%  |
| <b>Risk scores</b>                           |                                                    |                             |      |                                                   |                             |       |
| CHA <sub>2</sub> DS <sub>2</sub> -VASc score | 4 (3-5)                                            | 4 (3-5)                     | 0.7% | 4 (3-6)                                           | 4 (3-6)                     | 7.3%  |
| mHAS-BLED score*                             | 2 (2-3)                                            | 2 (2-3)                     | 0.5% | 3 (2-4)                                           | 3 (2-3)                     | 3.1%  |
| Charlson comorbidity index                   | 3 (2-5)                                            | 3 (2-5)                     | 2.1% | 5 (3-7)                                           | 4 (3-6)                     | 4.3%  |
| Hospital Frailty Risk score                  | 2.8 (0.3-6.7)                                      | 2.6 (0.0-6.6)               | 1.3% | 4.1 (0.9-8.6)                                     | 3.9 (0.8-8.9)               | 1.9%  |
| <b>Medical history</b>                       |                                                    |                             |      |                                                   |                             |       |
| Heart failure                                | 2067 (52.0)                                        | 2084 (52.5)                 | 0.9% | 823 (60.9)                                        | 788 (58.3)                  | 5.3%  |
| Previous hospitalisation for heart failure   | 565 (14.2)                                         | 579 (14.6)                  | 1.0% | 172 (12.7)                                        | 161 (11.9)                  | 2.5%  |
| Hypertension                                 | 3064 (77.1)                                        | 3034 (76.4)                 | 1.8% | 1204 (89.1)                                       | 1181 (87.4)                 | 5.3%  |
| Diabetes                                     | 1147 (28.9)                                        | 1150 (28.9)                 | 0.2% | 414 (30.6)                                        | 389 (28.8)                  | 4.0%  |
| Dyslipidaemia                                | 3233 (81.4)                                        | 3232 (81.3)                 | 0.1% | 1189 (88.0)                                       | 1178 (87.2)                 | 2.5%  |
| Ischaemic stroke                             | 1359 (34.2)                                        | 1330 (33.5)                 | 1.5% | 590 (43.7)                                        | 588 (43.5)                  | 0.3%  |
| Transient ischaemic attack                   | 360 (9.1)                                          | 393 (9.9)                   | 2.8% | 174 (12.9)                                        | 159 (11.8)                  | 3.4%  |
| Intracranial bleeding                        | 100 (2.5)                                          | 87 (2.2)                    | 2.2% | 62 (4.6)                                          | 63 (4.7)                    | 0.4%  |
| Myocardial infarction                        | 271 (6.8)                                          | 279 (7.0)                   | 0.8% | 162 (12.0)                                        | 157 (11.6)                  | 1.1%  |
| Peripheral arterial disease                  | 509 (12.8)                                         | 536 (13.5)                  | 2.0% | 239 (17.7)                                        | 243 (18.0)                  | 0.8%  |
| Valvular heart disease                       | 376 (9.5)                                          | 375 (9.4)                   | 0.1% | 246 (18.2)                                        | 247 (18.3)                  | 0.2%  |
| Chronic kidney disease                       | 232 (5.8)                                          | 220 (5.5)                   | 1.3% | 94 (7.0)                                          | 92 (6.8)                    | 0.6%  |
| Proteinuria                                  | 281 (7.1)                                          | 283 (7.1)                   | 0.2% | 127 (9.4)                                         | 117 (8.7)                   | 2.6%  |
| Hyperthyroidism                              | 371 (9.3)                                          | 381 (9.6)                   | 0.9% | 165 (12.2)                                        | 161 (11.9)                  | 0.9%  |
| Hypothyroidism                               | 466 (11.7)                                         | 441 (11.1)                  | 2.0% | 211 (15.6)                                        | 184 (13.6)                  | 5.7%  |
| Malignancy                                   | 890 (22.4)                                         | 915 (23.0)                  | 1.5% | 410 (30.3)                                        | 383 (28.3)                  | 4.4%  |
| COPD                                         | 1191 (30.0)                                        | 1211 (30.5)                 | 1.1% | 487 (36.0)                                        | 472 (34.9)                  | 2.3%  |
| Chronic liver disease                        | 1603 (40.3)                                        | 1626 (40.9)                 | 1.2% | 571 (42.3)                                        | 607 (44.9)                  | 5.4%  |
| Hypertrophic cardiomyopathy.                 | 56 (1.4)                                           | 55 (1.4)                    | 0.2% | 13 (1.0)                                          | 16 (1.2)                    | 2.2%  |
| Osteoporosis                                 | 1430 (36.0)                                        | 1420 (35.7)                 | 0.5% | 484 (35.8)                                        | 494 (36.6)                  | 1.5%  |
| Sleep apnea                                  | 20 (0.5)                                           | 19 (0.5)                    | 0.4% | 7 (0.5)                                           | 8 (0.6)                     | 1.0%  |
| <b>Concurrent medication†</b>                |                                                    |                             |      |                                                   |                             |       |

|                                  |              |              |       |              |              |       |
|----------------------------------|--------------|--------------|-------|--------------|--------------|-------|
| Oral anticoagulant               | 3973 (100.0) | 3973 (100.0) | <0.1% | 1351 (100.0) | 1351 (100.0) | <0.1% |
| Warfarin                         | 3253 (81.9)  | 3240 (81.6)  | 0.8%  | 1168 (86.5)  | 1161 (85.9)  | 1.5%  |
| NOAC                             | 962 (24.2)   | 980 (24.7)   | 1.1%  | 242 (17.9)   | 255 (18.9)   | 2.5%  |
| Beta-blocker                     | 2911 (73.3)  | 2793 (70.3)  | 6.6%  | 946 (70.0)   | 921 (68.2)   | 4.0%  |
| Non-DHP CCB                      | 663 (16.7)   | 642 (16.2)   | 1.4%  | 201 (14.9)   | 208 (15.4)   | 1.4%  |
| Digoxin                          | 613 (15.4)   | 729 (18.3)   | 7.8%  | 286 (21.2)   | 287 (21.2)   | 0.2%  |
| Aspirin                          | 794 (20.0)   | 793 (20.0)   | 0.1%  | 273 (20.2)   | 252 (18.7)   | 3.9%  |
| P2Y <sub>12</sub> inhibitor      | 397 (10.0)   | 386 (9.7)    | 0.9%  | 110 (8.1)    | 101 (7.5)    | 2.5%  |
| Statin                           | 1833 (46.1)  | 1807 (45.5)  | 1.3%  | 634 (46.9)   | 611 (45.2)   | 3.4%  |
| DHP CCB                          | 627 (15.8)   | 642 (16.2)   | 1.0%  | 214 (15.8)   | 226 (16.7)   | 2.4%  |
| ACEI/ARB                         | 2087 (52.5)  | 2107 (53.0)  | 1.0%  | 722 (53.4)   | 721 (53.4)   | 0.1%  |
| Loop/thiazide diuretics          | 1863 (46.9)  | 1849 (46.5)  | 0.7%  | 655 (48.5)   | 640 (47.4)   | 2.2%  |
| K <sup>+</sup> sparing diuretics | 736 (18.5)   | 746 (18.8)   | 0.6%  | 278 (20.6)   | 262 (19.4)   | 3.0%  |
| Alpha-blocker                    | 69 (1.7)     | 72 (1.8)     | 0.6%  | 28 (2.1)     | 35 (2.6)     | 3.4%  |

Values are presented as median (interquartile range) or n (%).

\*Modified HAS-BLED = hypertension, 1 point: >65 years old, 1 point: stroke history, 1 point: bleeding history or predisposition, 1 point: liable international normalised ratio, not assessed: ethanol or drug abuse, 1 point: drug predisposing to bleeding, 1 point.

†Defined as a prescription fill of ≥90 days within 6 months after the index date.

AAD, antiarrhythmic drug; ACEI, angiotensin converting enzyme inhibitor; AF, atrial fibrillation; ARB, angiotensin II receptor blocker; ASD, absolute standardised difference; COPD, chronic obstructive pulmonary disease; DHP, dihydropyridine; NOAC, non-vitamin K antagonist oral anticoagulant.



**Supplementary Table 5.** Definitions of 35 falsification endpoints.

| <b>Falsification endpoints</b>       | <b>Definitions</b>                                                 | <b>ICD-10 codes / other conditions</b>                                                |
|--------------------------------------|--------------------------------------------------------------------|---------------------------------------------------------------------------------------|
| Major fracture                       | Defined from diagnosis on inpatient or emergency department record | S72, S72.0, S72.1, S72.2, S12.0, S12.1, S12.2, S12.7, S12.9, S22.0, S22.1, S32.0, S32 |
| Fall accident                        | Defined from diagnosis on inpatient or emergency department record | W00-W19                                                                               |
| Viral enteritis                      | Defined from diagnosis*                                            | A08                                                                                   |
| Warts                                | Defined from diagnosis*                                            | B07                                                                                   |
| Acute hepatitis A                    | Defined from diagnosis*                                            | B15                                                                                   |
| Viral conjunctivitis                 | Defined from diagnosis*                                            | B30                                                                                   |
| Stomach cancer                       | Defined from diagnosis*                                            | C16                                                                                   |
| Bone malignancy                      | Defined from diagnosis*                                            | C40, C41, C90, C795                                                                   |
| Lymphoma                             | Defined from diagnosis*                                            | C81, C82, C83, C84, C85                                                               |
| Pterygium                            | Defined from diagnosis*                                            | H110                                                                                  |
| Otitis media                         | Defined from diagnosis*                                            | H65, H66, H67                                                                         |
| Meniere's disease                    | Defined from diagnosis*                                            | H810                                                                                  |
| Benign paroxysmal positional vertigo | Defined from diagnosis*                                            | H811                                                                                  |
| Varicose veins of lower extremities  | Defined from diagnosis*                                            | I83                                                                                   |
| Chronic sinusitis                    | Defined from diagnosis*                                            | J32                                                                                   |
| Benign neoplasm of colon, rectum     | Defined from diagnosis*                                            | D12                                                                                   |
| Acute appendicitis                   | Defined from diagnosis on inpatient or emergency department record | K35                                                                                   |
| Inguinal hernia                      | Defined from diagnosis*                                            | K40                                                                                   |
| Diverticulitis of intestine          | Defined from diagnosis*                                            | K57                                                                                   |
| Cholecystitis                        | Defined from diagnosis*                                            | K81                                                                                   |
| Cellulitis                           | Defined from diagnosis*                                            | L03                                                                                   |
| Allergic contact dermatitis          | Defined from diagnosis*                                            | L23                                                                                   |
| Urticaria                            | Defined from diagnosis*                                            | L50                                                                                   |
| Ingrowing nail                       | Defined from diagnosis*                                            | L600                                                                                  |
| Seropositive rheumatoid arthritis    | Defined from diagnosis*                                            | M05                                                                                   |
| Gout                                 | Defined from diagnosis*                                            | M10                                                                                   |
| Spinal stenosis                      | Defined from diagnosis*                                            | M480                                                                                  |
| Frozen shoulder                      | Defined from diagnosis*                                            | M750                                                                                  |
| Osteomyelitis                        | Defined from diagnosis*                                            | M86                                                                                   |
| Nausea and vomiting                  | Defined from diagnosis*                                            | R11                                                                                   |
| Dysuria                              | Defined from diagnosis*                                            | R30                                                                                   |
| Voice disturbances                   | Defined from diagnosis*                                            | R49                                                                                   |
| Seizure                              | Defined from diagnosis*                                            | R56                                                                                   |
| Burns                                | Defined from diagnosis*                                            | T20-T32                                                                               |
| Anaphylaxis/Allergic reaction        | Defined from diagnosis*                                            | T78                                                                                   |

\*For greater accuracy, either one diagnosis during hospitalisation or more than twice at outpatient clinics was required for the diagnosis.

ICD-10, International Classification of Diseases, Tenth Revision.

**Supplementary Table 6.** Baseline characteristics of patients undergoing early ( $\leq 1$  year) and late ( $> 1$  year) AF treatment.

| Variables                                    | Early AF treatment<br>(N=16323) | Late AF treatment<br>(N=6312) | P value |
|----------------------------------------------|---------------------------------|-------------------------------|---------|
| <b>Sociodemographic</b>                      |                                 |                               |         |
| Age, years                                   | 70 (62-76)                      | 69 (61-75)                    | <0.001  |
| <65 years                                    | 5010 (30.7)                     | 2119 (33.6)                   | <0.001  |
| 65-74 year                                   | 6050 (37.1)                     | 2389 (37.8)                   | 0.28    |
| $\geq 75$ years                              | 5263 (32.2)                     | 1804 (28.6)                   | <0.001  |
| Male                                         | 8567 (52.5)                     | 3633 (57.6)                   | <0.001  |
| AF duration, months                          | 0.0 (0.0-0.8)                   | 62.2 (31.5-105.3)             | <0.001  |
| Enroll year                                  |                                 |                               |         |
| 2011                                         | 1028 (6.3)                      | 494 (7.8)                     | <0.001  |
| 2012                                         | 2832 (17.3)                     | 1217 (19.3)                   | 0.001   |
| 2013                                         | 3461 (21.2)                     | 1372 (21.7)                   | 0.39    |
| 2014                                         | 3849 (23.6)                     | 1471 (23.3)                   | 0.67    |
| 2015                                         | 5153 (31.6)                     | 1758 (27.9)                   | <0.001  |
| High tertile of income                       | 7410 (45.4)                     | 2993 (47.4)                   | 0.006   |
| Number of OPD visits $\geq 12$ /year         | 13363 (81.9)                    | 5417 (85.8)                   | <0.001  |
| Living in metropolitan areas                 | 7425 (45.5)                     | 2826 (44.8)                   | 0.34    |
| Level of care initiating treatment           |                                 |                               |         |
| Tertiary                                     | 8486 (52.0)                     | 3717 (58.9)                   | <0.001  |
| Secondary                                    | 6984 (42.8)                     | 2281 (36.1)                   | <0.001  |
| Primary                                      | 853 (5.2)                       | 314 (5.0)                     | 0.46    |
| <b>Risk scores</b>                           |                                 |                               |         |
| CHA <sub>2</sub> DS <sub>2</sub> -VASc score | 4 (3-5)                         | 4 (3-6)                       | <0.001  |
| mHAS-BLED score*                             | 2 (2-3)                         | 3 (2-3)                       | <0.001  |
| Charlson comorbidity index                   | 3 (2-5)                         | 5 (3-7)                       | <0.001  |
| Hospital Frailty Risk score                  | 2.5 (0.0-6.3)                   | 3.7 (0.8-8.4)                 | <0.001  |
| <b>Medical history</b>                       |                                 |                               |         |
| Heart failure                                | 8419 (51.6)                     | 3945 (62.5)                   | <0.001  |
| Previous hospitalisation for heart failure   | 2250 (13.8)                     | 953 (15.1)                    | 0.01    |
| Hypertension                                 | 12335 (75.6)                    | 5682 (90.0)                   | <0.001  |
| Diabetes                                     | 4673 (28.6)                     | 1973 (31.3)                   | <0.001  |
| Dyslipidaemia                                | 13257 (81.2)                    | 5667 (89.8)                   | <0.001  |
| Ischaemic stroke                             | 5241 (32.1)                     | 2477 (39.2)                   | <0.001  |
| Transient ischaemic attack                   | 1610 (9.9)                      | 818 (13.0)                    | <0.001  |
| Intracranial bleeding                        | 366 (2.2)                       | 270 (4.3)                     | <0.001  |
| Myocardial infarction                        | 1217 (7.5)                      | 898 (14.2)                    | <0.001  |
| Peripheral arterial disease                  | 2222 (13.6)                     | 1217 (19.3)                   | <0.001  |
| Valvular heart disease                       | 1520 (9.3)                      | 1095 (17.3)                   | <0.001  |
| Chronic kidney disease                       | 1001 (6.1)                      | 540 (8.6)                     | <0.001  |
| Proteinuria                                  | 1125 (6.9)                      | 529 (8.4)                     | <0.001  |
| Hyperthyroidism                              | 1699 (10.4)                     | 1126 (17.8)                   | <0.001  |
| Hypothyroidism                               | 1978 (12.1)                     | 1104 (17.5)                   | <0.001  |
| Malignancy                                   | 3761 (23.0)                     | 1773 (28.1)                   | <0.001  |
| COPD                                         | 4912 (30.1)                     | 2335 (37.0)                   | <0.001  |
| Liver disease                                | 6652 (40.8)                     | 3066 (48.6)                   | <0.001  |
| Hypertrophic cardiomyopathy                  | 262 (1.6)                       | 143 (2.3)                     | 0.001   |
| Osteoporosis                                 | 5810 (35.6)                     | 2274 (36.0)                   | 0.55    |
| Sleep apnea                                  | 83 (0.5)                        | 50 (0.8)                      | 0.02    |
| <b>Concurrent medication†</b>                |                                 |                               |         |
| Oral anticoagulant                           | 16323 (100.0)                   | 6312 (100.0)                  | -       |
| Warfarin                                     | 13193 (80.8)                    | 5282 (83.7)                   | <0.001  |

|                                  |             |             |        |
|----------------------------------|-------------|-------------|--------|
| NOAC                             | 4065 (24.9) | 1354 (21.5) | <0.001 |
| Beta-blocker                     | 9646 (59.1) | 3359 (53.2) | <0.001 |
| Non-DHP CCB                      | 2308 (14.1) | 828 (13.1)  | 0.05   |
| Digoxin                          | 3076 (18.8) | 957 (15.2)  | <0.001 |
| Aspirin                          | 3344 (20.5) | 1333 (21.1) | 0.30   |
| P2Y <sub>12</sub> inhibitor      | 1475 (9.0)  | 563 (8.9)   | 0.80   |
| Statin                           | 7281 (44.6) | 2884 (45.7) | 0.15   |
| DHP CCB                          | 2949 (18.1) | 1118 (17.7) | 0.55   |
| ACEI/ARB                         | 8810 (54.0) | 3286 (52.1) | 0.01   |
| Loop/thiazide diuretics          | 7405 (45.4) | 2846 (45.1) | 0.72   |
| K <sup>+</sup> sparing diuretics | 2974 (18.2) | 1101 (17.4) | 0.18   |
| Alpha-blocker                    | 317 (1.9)   | 142 (2.2)   | 0.16   |

Values are presented as median (interquartile range) or n (%).

\*Modified HAS-BLED = hypertension, 1 point: >65 years old, 1 point: stroke history, 1 point: bleeding history or predisposition, 1 point: liable international normalised ratio, not assessed: ethanol or drug abuse, 1 point: drug predisposing to bleeding, 1 point.

†Defined as a prescription fill of  $\geq 90$  days within 6 months after the index date.

AAD, antiarrhythmic drug; ACEI, angiotensin converting enzyme inhibitor; AF, atrial fibrillation; ARB, angiotensin II receptor blocker; ASD, absolute standardised difference; COPD, chronic obstructive pulmonary disease; DHP, dihydropyridine; NOAC, non-vitamin K antagonist oral anticoagulant.

**Supplementary Table 7.** Baseline characteristics after overlap weighting.

| Variables                                    | After overlap weighting                            |                                          |       |                                                   |                                         |       |
|----------------------------------------------|----------------------------------------------------|------------------------------------------|-------|---------------------------------------------------|-----------------------------------------|-------|
|                                              | Early AF treatment<br>(≤1 year since AF diagnosis) |                                          |       | Late AF treatment<br>(>1 year since AF diagnosis) |                                         |       |
|                                              | Rhythm<br>Control<br>(N=2666.2<br>[9246]*)         | Rate<br>Control<br>(N=2666.2<br>[7077]*) | ASD   | Rhythm<br>Control<br>(N=927.6<br>[4407]*)         | Rate<br>Control<br>(N=927.6<br>[1905]*) | ASD   |
| <b>Sociodemographic</b>                      |                                                    |                                          |       |                                                   |                                         |       |
| Age, years                                   | 70 (62-76)                                         | 71 (62-77)                               | <0.1% | 70 (63-76)                                        | 71 (63-77)                              | <0.1% |
| <65 years                                    | 791.9 (29.7)                                       | 791.9 (29.7)                             | <0.1% | 271.7 (29.3)                                      | 271.7 (29.3)                            | <0.1% |
| 65-74 year                                   | 987.9 (37.1)                                       | 987.9 (37.1)                             | <0.1% | 348.1 (37.5)                                      | 348.1 (37.5)                            | <0.1% |
| ≥75 years                                    | 886.5 (33.2)                                       | 886.5 (33.2)                             | <0.1% | 307.7 (33.2)                                      | 307.7 (33.2)                            | <0.1% |
| Male                                         | 1426.5 (53.5)                                      | 1426.5 (53.5)                            | <0.1% | 542.1 (58.4)                                      | 542.1 (58.4)                            | <0.1% |
| AF duration, months                          | 0.0 (0.0-0.9)                                      | 0.0 (0.0-0.5)                            | <0.1% | 57.9 (29.6-<br>100.8)                             | 59.5 (29.2-<br>98.5)                    | <0.1% |
| Enroll year                                  |                                                    |                                          |       |                                                   |                                         |       |
| 2011                                         | 160.0 (6.0)                                        | 160.0 (6.0)                              | <0.1% | 66.6 (7.2)                                        | 66.6 (7.2)                              | <0.1% |
| 2012                                         | 465.0 (17.4)                                       | 465.0 (17.4)                             | <0.1% | 184.7 (19.9)                                      | 184.7 (19.9)                            | <0.1% |
| 2013                                         | 567.8 (21.3)                                       | 567.8 (21.3)                             | <0.1% | 203.0 (21.9)                                      | 203.0 (21.9)                            | <0.1% |
| 2014                                         | 615.0 (23.1)                                       | 615.0 (23.1)                             | <0.1% | 214.9 (23.2)                                      | 214.9 (23.2)                            | <0.1% |
| 2015                                         | 858.4 (32.2)                                       | 858.4 (32.2)                             | <0.1% | 258.4 (27.9)                                      | 258.4 (27.9)                            | <0.1% |
| High tertile of income                       | 1187.0 (44.5)                                      | 1187.0 (44.5)                            | <0.1% | 423.8 (45.7)                                      | 423.8 (45.7)                            | <0.1% |
| Number of OPD visits ≥12/year                | 2161.2 (81.1)                                      | 2161.2 (81.1)                            | <0.1% | 776.9 (83.8)                                      | 776.9 (83.8)                            | <0.1% |
| Living in metropolitan areas                 | 1203.9 (45.2)                                      | 1203.9 (45.2)                            | <0.1% | 403.6 (43.5)                                      | 403.6 (43.5)                            | <0.1% |
| Level of care initiating treatment           |                                                    |                                          |       |                                                   |                                         |       |
| Tertiary                                     | 1325.4 (49.7)                                      | 1325.4 (49.7)                            | <0.1% | 468.9 (50.6)                                      | 468.9 (50.6)                            | <0.1% |
| Secondary                                    | 1205.4 (45.2)                                      | 1205.4 (45.2)                            | <0.1% | 402.3 (43.4)                                      | 402.3 (43.4)                            | <0.1% |
| Primary                                      | 135.4 (5.1)                                        | 135.4 (5.1)                              | <0.1% | 56.3 (6.1)                                        | 56.3 (6.1)                              | <0.1% |
| <b>Risk scores</b>                           |                                                    |                                          |       |                                                   |                                         |       |
| CHA <sub>2</sub> DS <sub>2</sub> -VASc score | 4 (3-5)                                            | 4 (3-5)                                  | <0.1% | 4 (3-6)                                           | 4 (3-6)                                 | <0.1% |
| mHAS-BLED score†                             | 2 (2-3)                                            | 2 (2-3)                                  | <0.1% | 3 (2-3)                                           | 3 (2-3)                                 | <0.1% |
| Charlson comorbidity index                   | 3 (2-5)                                            | 3 (2-5)                                  | <0.1% | 5 (3-7)                                           | 5 (3-7)                                 | <0.1% |
| Hospital Frailty Risk score                  | 2.7 (0.1-6.6)                                      | 2.6 (0.0-6.6)                            | <0.1% | 3.9 (0.8-8.5)                                     | 3.8 (0.8-8.9)                           | <0.1% |
| <b>Medical history</b>                       |                                                    |                                          |       |                                                   |                                         |       |
| Heart failure                                | 1398.2 (52.4)                                      | 1398.2 (52.4)                            | <0.1% | 562.3 (60.6)                                      | 562.3 (60.6)                            | <0.1% |
| Previous hospitalisation for heart failure   | 387.6 (14.5)                                       | 387.6 (14.5)                             | <0.1% | 119.3 (12.9)                                      | 119.3 (12.9)                            | <0.1% |
| Hypertension                                 | 2052.8 (77.0)                                      | 2052.8 (77.0)                            | <0.1% | 830.0 (89.5)                                      | 830.0 (89.5)                            | <0.1% |
| Diabetes                                     | 778.3 (29.2)                                       | 778.3 (29.2)                             | <0.1% | 282.9 (30.5)                                      | 282.9 (30.5)                            | <0.1% |
| Dyslipidaemia                                | 2178.9 (81.7)                                      | 2178.9 (81.7)                            | <0.1% | 817.2 (88.1)                                      | 817.2 (88.1)                            | <0.1% |
| Ischaemic stroke                             | 897.4 (33.7)                                       | 897.4 (33.7)                             | <0.1% | 394.7 (42.6)                                      | 394.7 (42.6)                            | <0.1% |
| Transient ischaemic attack                   | 260.2 (9.8)                                        | 260.2 (9.8)                              | <0.1% | 114.3 (12.3)                                      | 114.3 (12.3)                            | <0.1% |
| Intracranial bleeding                        | 63.1 (2.4)                                         | 63.1 (2.4)                               | <0.1% | 41.0 (4.4)                                        | 41.0 (4.4)                              | <0.1% |
| Myocardial infarction                        | 194.1 (7.3)                                        | 194.1 (7.3)                              | <0.1% | 116.1 (12.5)                                      | 116.1 (12.5)                            | <0.1% |
| Peripheral arterial disease                  | 358.2 (13.4)                                       | 358.2 (13.4)                             | <0.1% | 171.6 (18.5)                                      | 171.6 (18.5)                            | <0.1% |
| Valvular heart disease                       | 249.0 (9.3)                                        | 249.0 (9.3)                              | <0.1% | 163.0 (17.6)                                      | 163.0 (17.6)                            | <0.1% |
| Chronic kidney disease                       | 159.3 (6.0)                                        | 159.3 (6.0)                              | <0.1% | 66.5 (7.2)                                        | 66.5 (7.2)                              | <0.1% |
| Proteinuria                                  | 187.1 (7.0)                                        | 187.1 (7.0)                              | <0.1% | 84.1 (9.1)                                        | 84.1 (9.1)                              | <0.1% |
| Hyperthyroidism                              | 258.4 (9.7)                                        | 258.4 (9.7)                              | <0.1% | 124.3 (13.4)                                      | 124.3 (13.4)                            | <0.1% |
| Hypothyroidism                               | 310.1 (11.6)                                       | 310.1 (11.6)                             | <0.1% | 134.8 (14.5)                                      | 134.8 (14.5)                            | <0.1% |
| Malignancy                                   | 618.9 (23.2)                                       | 618.9 (23.2)                             | <0.1% | 272.7 (29.4)                                      | 272.7 (29.4)                            | <0.1% |
| COPD                                         | 819.9 (30.8)                                       | 819.9 (30.8)                             | <0.1% | 338.2 (36.5)                                      | 338.2 (36.5)                            | <0.1% |
| Chronic liver disease                        | 1085.4 (40.7)                                      | 1085.4 (40.7)                            | <0.1% | 415.5 (44.8)                                      | 415.5 (44.8)                            | <0.1% |
| Hypertrophic cardiomyopathy                  | 40.9 (1.5)                                         | 40.9 (1.5)                               | <0.1% | 11.5 (1.2)                                        | 11.5 (1.2)                              | <0.1% |
| Osteoporosis                                 | 948.0 (35.6)                                       | 948.0 (35.6)                             | <0.1% | 333.3 (35.9)                                      | 333.3 (35.9)                            | <0.1% |
| Sleep apnea                                  | 12.8 (0.5)                                         | 12.8 (0.5)                               | <0.1% | 5.3 (0.6)                                         | 5.3 (0.6)                               | <0.1% |

| <b>Concurrent medication‡</b>    |                |                |       |               |               |       |  |
|----------------------------------|----------------|----------------|-------|---------------|---------------|-------|--|
| Oral anticoagulant               | 2666.2 (100.0) | 2666.2 (100.0) | <0.1% | 927.6 (100.0) | 927.6 (100.0) | <0.1% |  |
| Warfarin                         | 2170.3 (81.4)  | 2170.3 (81.4)  | <0.1% | 791.1 (85.3)  | 791.1 (85.3)  | <0.1% |  |
| NOAC                             | 658.6 (24.7)   | 658.6 (24.7)   | <0.1% | 181.1 (19.5)  | 181.1 (19.5)  | <0.1% |  |
| Beta-blocker                     | 1860.8 (69.8)  | 1860.8 (69.8)  | <0.1% | 623.3 (67.2)  | 623.3 (67.2)  | <0.1% |  |
| Non-DHP CCB                      | 439.9 (16.5)   | 439.9 (16.5)   | <0.1% | 144.3 (15.6)  | 144.3 (15.6)  | <0.1% |  |
| Digoxin                          | 451.3 (16.9)   | 451.3 (16.9)   | <0.1% | 194.3 (20.9)  | 194.3 (20.9)  | <0.1% |  |
| Aspirin                          | 548.3 (20.6)   | 548.3 (20.6)   | <0.1% | 183.2 (19.8)  | 183.2 (19.8)  | <0.1% |  |
| P2Y <sub>12</sub> inhibitor      | 262.2 (9.8)    | 262.2 (9.8)    | <0.1% | 76.1 (8.2)    | 76.1 (8.2)    | <0.1% |  |
| Statin                           | 1227.3 (46.0)  | 1227.3 (46.0)  | <0.1% | 426.2 (45.9)  | 426.2 (45.9)  | <0.1% |  |
| DHP CCB                          | 438.7 (16.5)   | 438.7 (16.5)   | <0.1% | 153.4 (16.5)  | 153.4 (16.5)  | <0.1% |  |
| ACEI/ARB                         | 1420.6 (53.3)  | 1420.6 (53.3)  | <0.1% | 493.5 (53.2)  | 493.5 (53.2)  | <0.1% |  |
| Loop/thiazide diuretics          | 1236.3 (46.4)  | 1236.3 (46.4)  | <0.1% | 438.1 (47.2)  | 438.1 (47.2)  | <0.1% |  |
| K <sup>+</sup> sparing diuretics | 496.3 (18.6)   | 496.3 (18.6)   | <0.1% | 179.6 (19.4)  | 179.6 (19.4)  | <0.1% |  |
| Alpha-blocker                    | 49.5 (1.9)     | 49.5 (1.9)     | <0.1% | 21.2 (2.3)    | 21.2 (2.3)    | <0.1% |  |

Values are presented as median (interquartile range) or n (%).

\*Weighted number of individuals [crude number of individuals]

†Modified HAS-BLED = hypertension, 1 point: >65 years old, 1 point: stroke history, 1 point: bleeding history or predisposition, 1 point: liable international normalised ratio, not assessed: ethanol or drug abuse, 1 point: drug predisposing to bleeding, 1 point.

‡Defined as a prescription fill of ≥90 days within 6 months after the index date.

AAD, antiarrhythmic drug; ACEI, angiotensin converting enzyme inhibitor; AF, atrial fibrillation; ARB, angiotensin II receptor blocker; ASD, absolute standardised difference; COPD, chronic obstructive pulmonary disease; DHP, dihydropyridine; NOAC, non-vitamin K antagonist oral anticoagulant.

**Supplementary Table 8.** Biological interactions.

| <b>Interaction with treatment strategies (rate/rhythm control)</b>     | <b>Early AF treatment</b> | <b>Late AF treatment</b> |
|------------------------------------------------------------------------|---------------------------|--------------------------|
| <b>Sex</b>                                                             |                           |                          |
| RERI                                                                   | 0.09 (-0.05 to 0.22)      | -0.18 (-0.47 to 0.11)    |
| AP                                                                     | 0.12 (-0.06 to 0.29)      | -0.18 (-0.46 to 0.10)    |
| <b>Age : <math>\geq 75</math> vs <math>&lt; 75</math></b>              |                           |                          |
| RERI                                                                   | 0.08 (-0.09 to 0.25)      | 0.15 (-0.13 to 0.44)     |
| AP                                                                     | 0.07 (-0.08 to 0.22)      | 0.12 (-0.10 to 0.34)     |
| <b>Previous ischaemic stroke</b>                                       |                           |                          |
| RERI                                                                   | -0.23 (-0.44 to -0.01)    | 0.09 (-0.22 to 0.41)     |
| AP                                                                     | -0.19 (-0.37 to -0.01)    | 0.06 (-0.15 to 0.28)     |
| <b>Previous hospitalisation for heart failure</b>                      |                           |                          |
| RERI                                                                   | 0.30 (0.08 to 0.53)*      | 0.65 (0.29 to 1.02)*     |
| AP                                                                     | 0.23 (0.07 to 0.38)*      | 0.42 (0.20 to 0.64)*     |
| <b>Previous myocardial infarction</b>                                  |                           |                          |
| RERI                                                                   | 0.17 (-0.10 to 0.45)      | -0.08 (-0.46 to 0.31)    |
| AP                                                                     | 0.16 (-0.09 to 0.41)      | -0.07 (-0.45 to 0.30)    |
| <b>Hypertension</b>                                                    |                           |                          |
| RERI                                                                   | -0.18 (-0.39 to 0.04)     | -0.08 (-0.56 to 0.40)    |
| AP                                                                     | -0.18 (-0.38 to 0.03)     | -0.07 (-0.48 to 0.34)    |
| <b>Diabetes</b>                                                        |                           |                          |
| RERI                                                                   | -0.04 (-0.19 to 0.12)     | -0.04 (-0.30 to 0.23)    |
| AP                                                                     | -0.04 (-0.24 to 0.15)     | -0.04 (-0.35 to 0.26)    |
| <b>Chronic kidney disease</b>                                          |                           |                          |
| RERI                                                                   | 0.05 (-0.30 to 0.41)      | 0.52 (0.03 to 1.01)*     |
| AP                                                                     | 0.05 (-0.29 to 0.39)      | 0.39 (0.06 to 0.71)*     |
| <b>Level of care : tertiary vs primary/secondary</b>                   |                           |                          |
| RERI                                                                   | -0.09 (-0.22 to 0.05)     | -0.35 (-0.63 to -0.06)   |
| AP                                                                     | -0.13 (-0.34 to 0.08)     | -0.46 (-0.81 to -0.10)   |
| <b>CHA<sub>2</sub>DS<sub>2</sub>-VASc : 1-3 vs <math>\geq 4</math></b> |                           |                          |
| RERI                                                                   | -0.24 (-0.50 to 0.01)     | 0.03 (-0.34 to 0.41)     |
| AP                                                                     | -0.35 (-0.71 to 0.02)     | 0.05 (-0.48 to 0.58)     |

Data are estimates (95% confidence interval).

\*Statistically significant with RERI  $> 0$  and AP  $> 0$ , indicating biological interaction.

AP, attributable proportion due to interaction; RERI, relative excess risk due to interaction.

**Supplementary Table 9.** Crossovers during follow-up.

|                                                                   | <b>Early AF treatment</b>          |                                  | <b>Late AF treatment</b>           |                                  |
|-------------------------------------------------------------------|------------------------------------|----------------------------------|------------------------------------|----------------------------------|
|                                                                   | <b>Rhythm control<br/>(N=9246)</b> | <b>Rate control<br/>(N=7707)</b> | <b>Rhythm control<br/>(N=4407)</b> | <b>Rate control<br/>(N=1905)</b> |
| <b>Crossover</b>                                                  | To rate control                    | To rhythm control                | To rate control                    | To rhythm control                |
| <b>N (%)</b>                                                      | 4078 (44.1)                        | 557 (7.9)                        | 1993 (45.2)                        | 119 (6.2)                        |
| <b>Median days<br/>to crossover<br/>(interquartile<br/>range)</b> | 263 (100-594)                      | 180 (0-496)                      | 163 (0-477)                        | 312 (100-549)                    |

**Supplementary Table 10.** Outcomes in weighted patients undergoing rhythm or rate control in on-treatment analyses in which patients were censored patients were censored at the time of crossover between treatment modalities or discontinuation of treatment.

|                                                                                      | Number of events        | Person-years | Event rate* | Number of events      | Person-years | Event rate* | Absolute rate difference* (95% CI) | Weighted HR (95% CI) | P value |
|--------------------------------------------------------------------------------------|-------------------------|--------------|-------------|-----------------------|--------------|-------------|------------------------------------|----------------------|---------|
| <b>Early AF treatment (<math>\leq 1</math> year since the first diagnosis of AF)</b> |                         |              |             |                       |              |             |                                    |                      |         |
|                                                                                      | Rhythm control (N=9246) |              |             | Rate control (N=7077) |              |             |                                    |                      |         |
| Primary outcome                                                                      | 791                     | 13872        | 7.03        | 1103                  | 11940        | 9.11        | -2.08 (-3.32 to -0.85)             | 0.77 (0.65 to 0.89)  | <0.001  |
| Components of primary outcome                                                        |                         |              |             |                       |              |             |                                    |                      |         |
| Cardiovascular death                                                                 | 119                     | 14546        | 1.08        | 155                   | 13002        | 1.06        | 0.02 (-0.41 to 0.46)               | 1.01 (0.67 to 1.52)  | 0.96    |
| Ischaemic stroke                                                                     | 321                     | 14259        | 2.62        | 469                   | 12567        | 3.93        | -1.31 (-2.08 to -0.54)             | 0.66 (0.52 to 0.84)  | <0.001  |
| Hospitalisation for HF                                                               | 388                     | 14167        | 3.43        | 603                   | 12357        | 4.56        | -1.13 (-1.99 to -0.28)             | 0.74 (0.60 to 0.92)  | 0.007   |
| Acute MI                                                                             | 30                      | 14515        | 0.24        | 46                    | 12957        | 0.43        | -0.19 (-0.43 to 0.05)              | 0.54 (0.25 to 1.18)  | 0.12    |
| <b>Late AF treatment (<math>&gt; 1</math> year since the first diagnosis of AF)</b>  |                         |              |             |                       |              |             |                                    |                      |         |
|                                                                                      | Rhythm control (N=4407) |              |             | Rate control (N=1905) |              |             |                                    |                      |         |
| Primary outcome                                                                      | 438                     | 6841         | 8.06        | 291                   | 3152         | 8.56        | -0.50 (-2.62 to 1.62)              | 0.93 (0.72 to 1.20)  | 0.58    |
| Components of primary outcome                                                        |                         |              |             |                       |              |             |                                    |                      |         |
| Cardiovascular death                                                                 | 60                      | 7242         | 1.28        | 44                    | 3416         | 1.17        | 0.10 (-0.67 to 0.89)               | 1.08 (0.57 to 2.06)  | 0.81    |
| Ischaemic stroke                                                                     | 156                     | 7074         | 3.08        | 135                   | 3301         | 3.70        | -0.62 (-1.94 to 0.71)              | 0.82 (0.55 to 1.22)  | 0.32    |
| Hospitalisation for HF                                                               | 256                     | 7002         | 4.19        | 142                   | 3262         | 4.05        | 0.14 (-1.33 to 1.62)               | 1.02 (0.72 to 1.46)  | 0.92    |
| Acute MI                                                                             | 17                      | 7231         | 0.23        | 13                    | 3405         | 0.36        | -0.13 (-0.51 to 0.25)              | 0.63 (0.16 to 2.47)  | 0.51    |

\*Weighted incidence rate (per 100 person-years) comparing rhythm- and rate-controlled patients after overlap weighting was applied.

AF, atrial fibrillation; CI, confidence interval; HF, heart failure; HR, hazard ratio; MI, myocardial infarction.



**Supplementary Table 11.** Outcomes in weighted patients undergoing rhythm or rate control in time-varying regression analyses which treatment was treated as a time-dependent variable.

|                                                                                      | Number<br>of events | Person-<br>years | Event<br>rate* | Number<br>of events | Person-<br>years | Event<br>rate* | Absolute rate difference*<br>(95% CI) | Weighted HR<br>(95% CI) | P<br>value |
|--------------------------------------------------------------------------------------|---------------------|------------------|----------------|---------------------|------------------|----------------|---------------------------------------|-------------------------|------------|
| <b>Early AF treatment (<math>\leq 1</math> year since the first diagnosis of AF)</b> |                     |                  |                |                     |                  |                |                                       |                         |            |
|                                                                                      | Rhythm control      |                  |                | Rate control        |                  |                |                                       |                         |            |
| Primary outcome                                                                      | 864                 | 14543            | 7.20           | 1499                | 17529            | 8.88           | -1.68 (-2.79 to -0.56)                | 0.81 (0.71 to 0.94)     | 0.005      |
| Components of primary outcome                                                        |                     |                  |                |                     |                  |                |                                       |                         |            |
| Cardiovascular death                                                                 | 162                 | 15416            | 1.32           | 363                 | 19198            | 2.00           | -0.69 (-1.17 to -0.20)                | 0.65 (0.48 to 0.90)     | 0.008      |
| Ischaemic stroke                                                                     | 341                 | 15006            | 2.60           | 617                 | 18472            | 3.63           | -1.02 (-1.70 to -0.35)                | 0.73 (0.58 to 0.91)     | 0.006      |
| Hospitalisation for HF                                                               | 433                 | 14887            | 3.60           | 756                 | 18220            | 4.15           | -0.55 (-1.31 to 0.22)                 | 0.88 (0.72 to 1.07)     | 0.19       |
| Acute MI                                                                             | 33                  | 15380            | 0.25           | 68                  | 19127            | 0.37           | -0.12 (-0.33 to 0.09)                 | 0.68 (0.33 to 1.39)     | 0.29       |
| <b>Late AF treatment (<math>&gt; 1</math> year since the first diagnosis of AF)</b>  |                     |                  |                |                     |                  |                |                                       |                         |            |
|                                                                                      | Rhythm control      |                  |                | Rate control        |                  |                |                                       |                         |            |
| Primary outcome                                                                      | 452                 | 6991             | 8.05           | 544                 | 5912             | 8.95           | -0.90 (-2.85 to 1.05)                 | 0.90 (0.71 to 1.14)     | 0.37       |
| Components of primary outcome                                                        |                     |                  |                |                     |                  |                |                                       |                         |            |
| Cardiovascular death                                                                 | 66                  | 7428             | 1.40           | 180                 | 6580             | 2.25           | -0.85 (-1.69 to -1.39)                | 0.62 (0.38 to 1.03)     | 0.07       |
| Ischaemic stroke                                                                     | 161                 | 7241             | 3.01           | 225                 | 6290             | 3.56           | -0.54 (-1.72 to 0.64)                 | 0.85 (0.59 to 1.24)     | 0.40       |
| Hospitalisation for HF                                                               | 266                 | 7169             | 4.28           | 266                 | 6186             | 4.14           | 0.14 (-1.22 to 1.50)                  | 1.04 (0.76 to 1.44)     | 0.80       |
| Acute MI                                                                             | 17                  | 7416             | 0.21           | 22                  | 6556             | 0.32           | -0.11 (-0.43 to 0.22)                 | 0.69 (0.19 to 2.56)     | 0.58       |

\*Weighted incidence rate (per 100 person-years) comparing rhythm- and rate-controlled patients after overlap weighting was applied.  
AF, atrial fibrillation; CI, confidence interval; HF, heart failure; HR, hazard ratio; MI, myocardial infarction.

**Supplementary Table 12.** Outcomes in propensity score matched patients undergoing rhythm or rate control.

|                                                                                      | Number<br>of events     | Person-<br>years | Event<br>rate | Number<br>of events   | Person-<br>years | Event<br>rate | Absolute rate<br>difference per 100<br>person-years<br>(95% CI) | Hazard ratio<br>(95% CI) | P value |
|--------------------------------------------------------------------------------------|-------------------------|------------------|---------------|-----------------------|------------------|---------------|-----------------------------------------------------------------|--------------------------|---------|
| <b>Early AF treatment (<math>\leq 1</math> year since the first diagnosis of AF)</b> |                         |                  |               |                       |                  |               |                                                                 |                          |         |
|                                                                                      | Rhythm control (N=3973) |                  |               | Rate control (N=3973) |                  |               |                                                                 |                          |         |
| Primary outcome                                                                      | 587                     | 8197             | 7.16          | 712                   | 7939             | 8.97          | -1.81 (-2.68 to -0.93)                                          | 0.81 (0.72 to 0.90)      | <0.001  |
| Components of primary outcome                                                        |                         |                  |               |                       |                  |               |                                                                 |                          |         |
| Cardiovascular death                                                                 | 183                     | 8824             | 2.07          | 202                   | 8757             | 2.31          | -0.23 (-0.67 to 0.20)                                           | 0.91 (0.74 to 1.11)      | 0.35    |
| Ischaemic stroke                                                                     | 229                     | 8537             | 2.68          | 307                   | 8373             | 3.67          | -0.98 (-1.52 to -0.47)                                          | 0.74 (0.62 to 0.88)      | <0.001  |
| Hospitalisation for HF                                                               | 270                     | 8476             | 3.19          | 335                   | 8308             | 4.03          | -0.85 (-1.42 to -0.27)                                          | 0.80 (0.68 to 0.94)      | 0.007   |
| Acute MI                                                                             | 17                      | 8807             | 0.19          | 35                    | 8709             | 0.40          | -0.21 (-0.37 to -0.05)                                          | 0.49 (0.27 to 0.87)      | 0.02    |
| <b>Late AF treatment (<math>&gt; 1</math> year since the first diagnosis of AF)</b>  |                         |                  |               |                       |                  |               |                                                                 |                          |         |
|                                                                                      | Rhythm control (N=1351) |                  |               | Rate control (N=1351) |                  |               |                                                                 |                          |         |
| Primary outcome                                                                      | 261                     | 2839             | 9.19          | 255                   | 2839             | 8.98          | 0.21 (-1.36 to 1.78)                                            | 1.03 (0.86 to 1.22)      | 0.77    |
| Components of primary outcome                                                        |                         |                  |               |                       |                  |               |                                                                 |                          |         |
| Cardiovascular death                                                                 | 79                      | 3125             | 2.53          | 87                    | 3110             | 2.80          | -0.27 (-1.08 to 0.54)                                           | 0.91 (0.67 to 1.23)      | 0.52    |
| Ischaemic stroke                                                                     | 101                     | 2972             | 3.40          | 110                   | 2990             | 3.68          | -0.28 (-1.24 to 0.67)                                           | 0.92 (0.71 to 1.21)      | 0.56    |
| Hospitalisation for HF                                                               | 134                     | 2974             | 4.51          | 108                   | 2959             | 3.65          | 0.86 (-0.17 to 1.89)                                            | 1.25 (0.97 to 1.61)      | 0.09    |
| Acute MI                                                                             | 7                       | 3120             | 0.22          | 11                    | 3095             | 0.36          | -0.13 (-0.40 to 0.14)                                           | 1.25 (0.98 to 1.61)      | 0.08    |

AF, atrial fibrillation; CI, confidence interval; HF, heart failure; MI, myocardial infarction.

**Supplementary Table 13.** Outcomes in weighted patients undergoing rhythm or rate control among those without prevalent heart failure, hypertension, or previous myocardial infarction.

|                                                                                      | Number of events       | Person-years | Event rate* | Number of events      | Person-years | Event rate* | Absolute rate difference per 100 person-years* (95% CI) | Weighted HR (95% CI) | P value |
|--------------------------------------------------------------------------------------|------------------------|--------------|-------------|-----------------------|--------------|-------------|---------------------------------------------------------|----------------------|---------|
| <b>Early AF treatment (<math>\leq 1</math> year since the first diagnosis of AF)</b> |                        |              |             |                       |              |             |                                                         |                      |         |
|                                                                                      | Rhythm control (N=843) |              |             | Rate control (N=1114) |              |             |                                                         |                      |         |
| Primary outcome                                                                      | 72                     | 1816         | 4.65        | 173                   | 2461         | 6.53        | -1.88 (-3.48 to -0.28)                                  | 0.71 (0.53 to 0.96)  | 0.03    |
| Components of primary outcome                                                        |                        |              |             |                       |              |             |                                                         |                      |         |
| Cardiovascular death                                                                 | 26                     | 1880         | 1.71        | 63                    | 2636         | 2.18        | -0.47 (-1.39 to 0.45)                                   | 0.79 (0.49 to 1.29)  | 0.34    |
| Ischaemic stroke                                                                     | 42                     | 1831         | 2.59        | 95                    | 2510         | 3.53        | -0.93 (-2.11 to 0.24)                                   | 0.74 (0.50 to 1.10)  | 0.13    |
| Hospitalisation for HF                                                               | 11                     | 1867         | 0.84        | 48                    | 2578         | 1.75        | -0.91 (-1.66 to -0.16)                                  | 0.49 (0.25 to 0.93)  | 0.03    |
| Acute MI                                                                             | 5                      | 1875         | 0.19        | 0                     | 2636         | 0.00        | 0.19 (-0.03 to 0.41)                                    | -                    | 0.99    |
| <b>Late AF treatment (<math>&gt; 1</math> year since the first diagnosis of AF)</b>  |                        |              |             |                       |              |             |                                                         |                      |         |
|                                                                                      | Rhythm control (N=169) |              |             | Rate control (N=179)  |              |             |                                                         |                      |         |
| Primary outcome                                                                      | 19                     | 390          | 6.68        | 29                    | 394          | 6.92        | -0.23 (-4.63 to 4.15)                                   | 1.00 (0.52 to 1.91)  | 0.99    |
| Components of primary outcome                                                        |                        |              |             |                       |              |             |                                                         |                      |         |
| Cardiovascular death                                                                 | 4                      | 416          | 1.31        | 13                    | 423          | 2.67        | -1.36 (-3.64 to 0.92)                                   | 0.51 (0.15 to 1.74)  | 0.28    |
| Ischaemic stroke                                                                     | 12                     | 397          | 4.00        | 16                    | 405          | 4.04        | -0.03 (-3.37 to 3.31)                                   | 1.03 (0.45 to 2.37)  | 0.94    |
| Hospitalisation for HF                                                               | 6                      | 405          | 1.73        | 6                     | 412          | 1.31        | 0.41 (-1.61 to 2.43)                                    | 1.38 (0.36 to 5.26)  | 0.64    |
| Acute MI                                                                             | 0                      | 416          | 0.00        | 1                     | 422          | 0.18        | -0.18 (-0.66 to 0.30)                                   | -                    | -       |

\*Weighted incidence rate (per 100 person-years) comparing rhythm- and rate-controlled patients after overlap weighting was applied.

AF, atrial fibrillation; CI, confidence interval; HF, heart failure; HR, hazard ratio; MI, myocardial infarction.

**Supplementary Table 14.** Outcomes in weighted patients undergoing rhythm or rate control defined using a 30-day enroll period after the first prescription instead of the 180-day period in main analyses.

|                                                                                      | Number of events         | Person-years | Event rate* | Number of events      | Person-years | Event rate* | Absolute rate difference per 100 person-years* (95% CI) | Weighted HR (95% CI) | P value |
|--------------------------------------------------------------------------------------|--------------------------|--------------|-------------|-----------------------|--------------|-------------|---------------------------------------------------------|----------------------|---------|
| <b>Early AF treatment (<math>\leq 1</math> year since the first diagnosis of AF)</b> |                          |              |             |                       |              |             |                                                         |                      |         |
|                                                                                      | Rhythm control (N=10342) |              |             | Rate control (N=7890) |              |             |                                                         |                      |         |
| Primary outcome                                                                      | 2136                     | 24697        | 10.02       | 2231                  | 18157        | 11.92       | -1.90 (-2.92 to -0.88)                                  | 0.85 (0.77 to 0.93)  | <0.001  |
| Components of primary outcome                                                        |                          |              |             |                       |              |             |                                                         |                      |         |
| Cardiovascular death                                                                 | 532                      | 26687        | 2.49        | 573                   | 20235        | 2.56        | -0.07 (-0.54 to 0.39)                                   | 0.98 (0.82 to 1.18)  | 0.84    |
| Ischaemic stroke                                                                     | 753                      | 25513        | 3.32        | 882                   | 18872        | 4.73        | -1.41 (-2.02 to -0.80)                                  | 0.71 (0.61 to 0.83)  | <0.001  |
| Hospitalisation for HF                                                               | 867                      | 25242        | 3.88        | 961                   | 18742        | 4.88        | -1.00 (-1.64 to -0.37)                                  | 0.80 (0.69 to 0.93)  | 0.003   |
| Acute MI                                                                             | 82                       | 26567        | 0.32        | 67                    | 20143        | 0.38        | -0.06 (-0.23 to 0.12)                                   | 0.86 (0.52 to 1.42)  | 0.56    |
| <b>Late AF treatment (<math>&gt; 1</math> year since the first diagnosis of AF)</b>  |                          |              |             |                       |              |             |                                                         |                      |         |
|                                                                                      | Rhythm control (N=4826)  |              |             | Rate control (N=2387) |              |             |                                                         |                      |         |
| Primary outcome                                                                      | 1226                     | 11747        | 11.51       | 709                   | 5537         | 12.12       | -0.62 (-2.34 to 1.11)                                   | 0.95 (0.82 to 1.10)  | 0.52    |
| Components of primary outcome                                                        |                          |              |             |                       |              |             |                                                         |                      |         |
| Cardiovascular death                                                                 | 343                      | 12871        | 2.84        | 175                   | 6272         | 2.61        | 0.23 (-0.56 to 1.01)                                    | 1.08 (0.81 to 1.45)  | 0.58    |
| Ischaemic stroke                                                                     | 399                      | 12235        | 3.66        | 272                   | 5854         | 4.32        | -0.66 (-1.64 to 0.32)                                   | 0.84 (0.66 to 1.07)  | 0.16    |
| Hospitalisation for HF                                                               | 607                      | 11943        | 4.68        | 260                   | 5861         | 4.36        | 0.32 (-0.73 to 1.37)                                    | 1.07 (0.85 to 1.35)  | 0.58    |
| Acute MI                                                                             | 49                       | 12819        | 0.35        | 23                    | 6238         | 0.34        | 0.00 (-0.27 to 0.29)                                    | 1.01 (0.45 to 2.28)  | 0.98    |

\*Weighted incidence rate (per 100 person-years) comparing rhythm- and rate-controlled patients after overlap weighting was applied.

Rhythm control in this analysis was defined as a prescription of more than a 20-day supply of any rhythm-control drugs in the 30-day period since the first prescription or the performance of an ablation procedure for AF.

Rate control in this analysis was defined as a prescription of more than a 20-day supply of any rate-control drugs in the 30-day period since the first prescription and with no prescription of rhythm-control drug and no ablation within this period. Patients prescribed rhythm-control drugs for more than 20 days or who underwent ablation within the 30-day period since the initiation of rate-control drugs were classified as intention-to-treat with rhythm control.

AF, atrial fibrillation; CI, confidence interval; HF, heart failure; HR, hazard ratio; MI, myocardial infarction.

**Supplementary Table 15.** Risk of composite outcome not including hospitalisation for heart failure in weighted patients undergoing rhythm or rate control.

| <b>Outcome</b>                                                                          | Number of events        | Person-years | Event rate* | Number of events      | Person-years | Event rate* | Absolute rate difference* (95% CI) | Weighted HR (95% CI) | P value |
|-----------------------------------------------------------------------------------------|-------------------------|--------------|-------------|-----------------------|--------------|-------------|------------------------------------|----------------------|---------|
| <b>Early AF treatment (<math>\leq 1</math> year since the first diagnosis of AF)</b>    |                         |              |             |                       |              |             |                                    |                      |         |
|                                                                                         | Rhythm control (N=9246) |              |             | Rate control (N=7077) |              |             |                                    |                      |         |
| The composite of cardiovascular death, ischaemic stroke, or acute myocardial infarction | 776                     | 20117        | 4.69        | 874                   | 15175        | 5.77        | -1.08 (-1.92 to -0.23)             | 0.82 (0.70 to 0.97)  | 0.02    |
| <b>Late AF treatment (<math>\geq 1</math> year since the first diagnosis of AF)</b>     |                         |              |             |                       |              |             |                                    |                      |         |
|                                                                                         | Rhythm control (N=4407) |              |             | Rate control (N=1905) |              |             |                                    |                      |         |
| The composite of cardiovascular death, ischaemic stroke, or acute myocardial infarction | 417                     | 10043        | 5.35        | 268                   | 4128         | 6.06        | -0.71 (-2.17 to 0.76)              | 0.88 (0.68 to 1.14)  | 0.35    |

\*Weighted incidence rate (per 100 person-years) comparing rhythm- and rate-controlled patients after overlap weighting was applied. AF, atrial fibrillation; CI, confidence interval; HR, hazard ratio.

**Supplementary Table 16.** Risk of 35 falsification endpoints in weighted patients undergoing rhythm control compared with rate control.

| Endpoints                            | Early AF treatment<br>(≤1 year<br>since AF diagnosis) |         | Late AF treatment<br>(>1 year<br>since AF diagnosis) |         |
|--------------------------------------|-------------------------------------------------------|---------|------------------------------------------------------|---------|
|                                      | HR (95% CI)                                           | P value | HR (95% CI)                                          | P value |
| Major fracture                       | 1.16 (0.97 to 1.39)                                   | 0.111   | 1.02 (0.77 to 1.35)                                  | 0.887   |
| Fall accident                        | 1.49 (0.69 to 3.19)                                   | 0.310   | 0.41 (0.14 to 1.19)                                  | 0.100   |
| Viral enteritis                      | 1.24 (0.77 to 2.00)                                   | 0.384   | 1.57 (0.77 to 3.18)                                  | 0.215   |
| Warts                                | 1.07 (0.59 to 1.95)                                   | 0.818   | 0.38 (0.17 to 0.82)                                  | 0.015   |
| Acute hepatitis A                    | 1.01 (0.45 to 2.30)                                   | 0.975   | 0.77 (0.28 to 0.82)                                  | 0.599   |
| Viral conjunctivitis                 | 1.17 (0.78 to 1.75)                                   | 0.444   | 1.11 (0.61 to 2.03)                                  | 0.724   |
| Stomach cancer                       | 0.80 (0.61 to 1.05)                                   | 0.103   | 1.17 (0.76 to 1.80)                                  | 0.481   |
| Bone malignancy                      | 0.79 (0.52 to 1.21)                                   | 0.279   | 0.53 (0.24 to 1.16)                                  | 0.111   |
| Lymphoma                             | 0.91 (0.43 to 1.92)                                   | 0.802   | 0.34 (0.10 to 1.17)                                  | 0.087   |
| Pterygium                            | 1.05 (0.75 to 1.46)                                   | 0.777   | 1.64 (0.90 to 2.99)                                  | 0.106   |
| Otitis media                         | 1.02 (0.88 to 1.19)                                   | 0.770   | 1.14 (0.88 to 1.48)                                  | 0.319   |
| Meniere's disease                    | 1.02 (0.88 to 1.19)                                   | 0.856   | 1.32 (0.87 to 2.01)                                  | 0.192   |
| Benign paroxysmal positional vertigo | 0.91 (0.74 to 1.11)                                   | 0.356   | 1.63 (1.15 to 2.32)                                  | 0.006   |
| Varicose veins of lower extremities  | 0.90 (0.61 to 1.34)                                   | 0.614   | 0.98 (0.57 to 1.70)                                  | 0.945   |
| Chronic sinusitis                    | 1.09 (0.95 to 1.25)                                   | 0.237   | 1.15 (0.93 to 1.42)                                  | 0.186   |
| Benign neoplasm of colon, rectum     | 1.35 (1.07 to 1.70)                                   | 0.011   | 1.19 (0.85 to 1.66)                                  | 0.305   |
| Acute appendicitis                   | 1.30 (0.76 to 2.23)                                   | 0.336   | 1.64 (0.67 to 4.02)                                  | 0.279   |
| Inguinal hernia                      | 1.33 (0.87 to 2.03)                                   | 0.193   | 0.70 (0.36 to 1.37)                                  | 0.302   |
| Diverticulitis of intestine          | 1.48 (0.89 to 2.45)                                   | 0.127   | 1.20 (0.53 to 2.71)                                  | 0.662   |
| Cholecystitis                        | 0.83 (0.59 to 1.16)                                   | 0.275   | 1.25 (0.71 to 2.21)                                  | 0.440   |
| Cellulitis                           | 1.14 (1.02 to 1.28)                                   | 0.027   | 0.95 (0.80 to 1.13)                                  | 0.591   |
| Allergic contact dermatitis          | 1.08 (1.00 to 1.16)                                   | 0.049   | 1.04 (0.93 to 1.18)                                  | 0.471   |
| Urticaria                            | 1.03 (0.94 to 1.13)                                   | 0.495   | 1.16 (0.99 to 1.35)                                  | 0.060   |
| Ingrowing nail                       | 1.30 (0.91 to 1.86)                                   | 0.148   | 0.75 (0.43 to 1.32)                                  | 0.317   |
| Seropositive rheumatoid arthritis    | 0.95 (0.64 to 1.41)                                   | 0.789   | 1.02 (0.53 to 1.97)                                  | 0.949   |
| Gout                                 | 0.95 (0.64 to 1.41)                                   | 0.511   | 1.10 (0.90 to 1.35)                                  | 0.344   |
| Spinal stenosis                      | 1.05 (0.97 to 1.41)                                   | 0.244   | 1.13 (0.99 to 1.30)                                  | 0.067   |
| Frozen shoulder                      | 0.94 (0.83 to 1.06)                                   | 0.329   | 0.86 (0.70 to 1.05)                                  | 0.125   |
| Osteomyelitis                        | 1.07 (0.52 to 2.21)                                   | 0.859   | 1.00 (0.35 to 2.85)                                  | 0.998   |
| Nausea and vomiting                  | 1.06 (0.98 to 1.16)                                   | 0.135   | 1.20 (1.05 to 1.38)                                  | 0.007   |
| Dysuria                              | 0.92 (0.76 to 1.10)                                   | 0.360   | 0.99 (0.74 to 1.32)                                  | 0.932   |
| Voice disturbance                    | 1.49 (0.58 to 3.82)                                   | 0.407   | 1.18 (0.35 to 3.98)                                  | 0.793   |
| Seizure                              | 0.86 (0.68 to 1.11)                                   | 0.245   | 0.94 (0.64 to 1.39)                                  | 0.767   |
| Burns                                | 1.21 (0.93 to 1.59)                                   | 0.159   | 1.32 (0.83 to 2.08)                                  | 0.238   |
| Anaphylaxis/Allergic reaction        | 0.92 (0.65 to 1.29)                                   | 0.617   | 1.17 (0.69 to 1.98)                                  | 0.558   |

CI, confidence interval; HR, hazard ratio.

**Supplementary Table 17.** Cumulative duration of treatment for patients initiating rhythm- or rate-control treatments.

| Duration (days) | Early AF treatment          |                          | Late AF treatment           |                          |
|-----------------|-----------------------------|--------------------------|-----------------------------|--------------------------|
|                 | Rhythm control*<br>(N=9101) | Rate control<br>(N=7077) | Rhythm control*<br>(N=3768) | Rate control<br>(N=1905) |
| 0-360           | 2383 (26.2)                 | 1195 (16.9)              | 1202 (31.9)                 | 373 (19.6)               |
| 361-720         | 3100 (34.1)                 | 2400 (33.9)              | 1202 (31.9)                 | 596 (31.3)               |
| 721-1080        | 1703 (18.7)                 | 1405 (19.9)              | 622 (16.5)                  | 405 (21.3)               |
| 1080-           | 1915 (21.0)                 | 2077 (29.3)              | 72 (19.7)                   | 531 (27.9)               |

Numbers are n (%).

\*Analysis conducted in rhythm-controlled patients not undergoing catheter ablation at baseline.

**Supplementary Table 18.** Primary composite outcome associated with cumulative exposure to antiarrhythmic drugs (AADs).

|                          | <b>Early rhythm control</b>                       | <b>Late rhythm control</b>                        |
|--------------------------|---------------------------------------------------|---------------------------------------------------|
| <b>Duration (days)</b>   | <b>Hazard ratio<br/>(95% confidence interval)</b> | <b>Hazard ratio<br/>(95% confidence interval)</b> |
| 0-360                    | 1 (ref)                                           | 1 (ref)                                           |
| 361-720                  | 0.97 (0.84 to 1.11)                               | 1.13 (0.94 to 1.35)                               |
| 721-1080                 | 0.77 (0.64 to 0.92)                               | 0.78 (0.60 to 1.02)                               |
| 1081-                    | 0.35 (0.27 to 0.44)                               | 0.42 (0.30 to 0.59)                               |
| <b>P value for trend</b> | <b>&lt;0.001</b>                                  | <b>&lt;0.001</b>                                  |

Analysis conducted in rhythm-controlled patients not undergoing catheter ablation.  
 Follow-up begins at the end of the last AAD prescription.



**Supplementary Figure 1.** Distributions of the propensity scores before and after overlap weighting in (A) early and (B) late treatment populations.

**A. Early AF treatment ( $\leq 1$  year since the first AF diagnosis)**

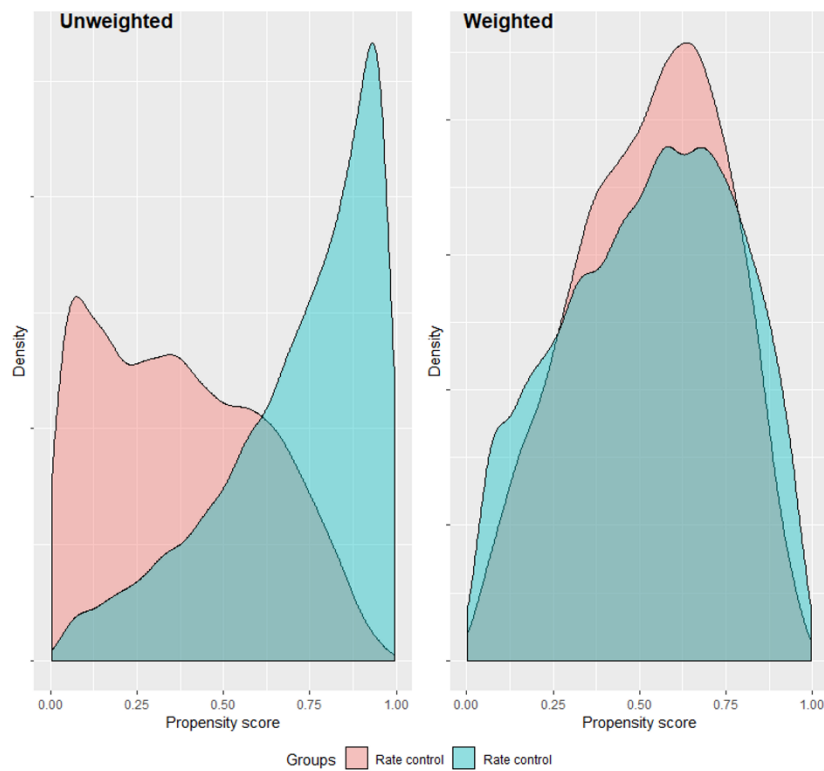

**B. Late AF treatment ( $>1$  year since the first AF diagnosis)**

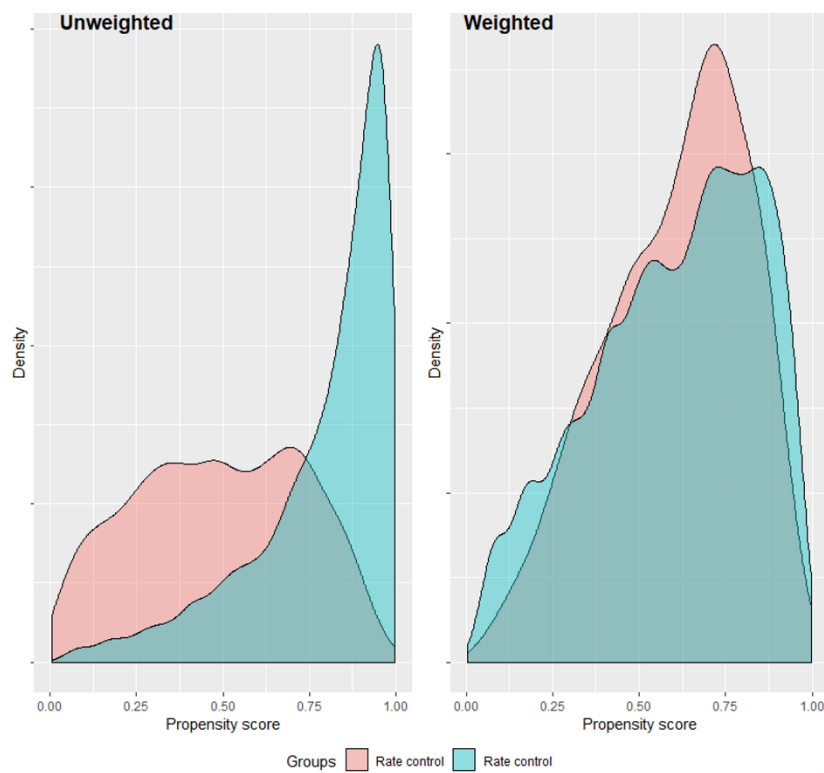

**Supplementary Figure 2.** Schematic diagram showing the analytical approach used in this study.

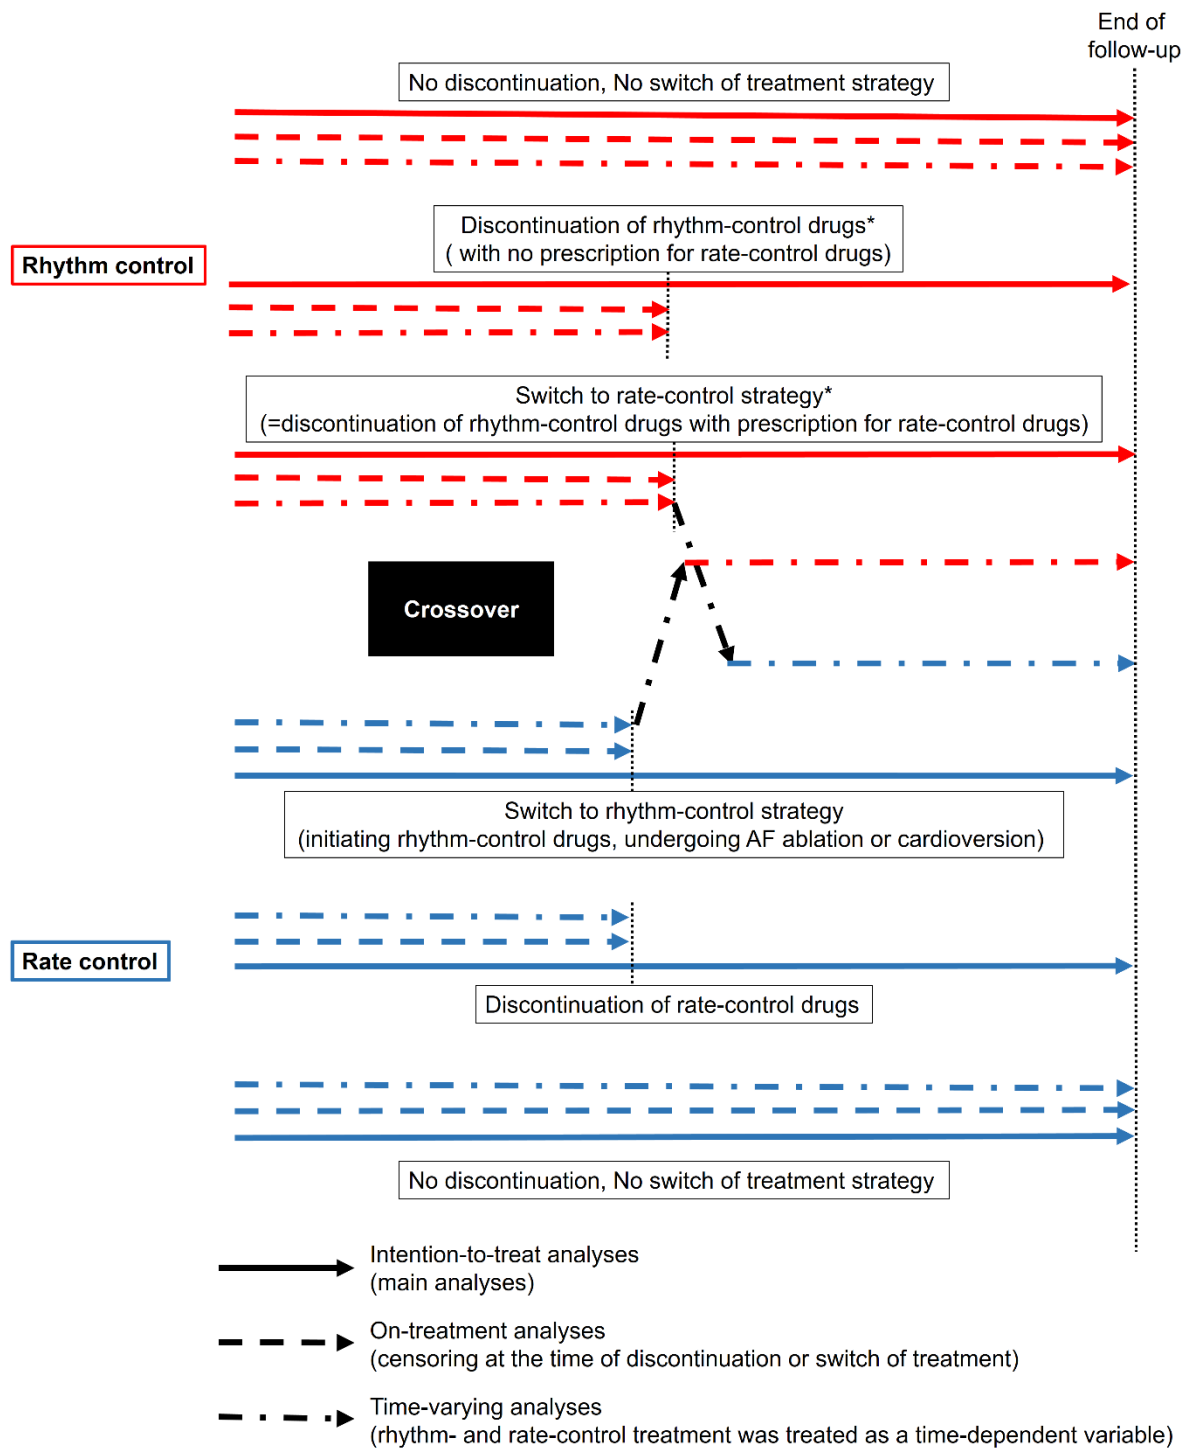

\*No crossover was permitted in the rhythm-controlled patients who underwent ablation.

**Supplementary Figure 3.** Risk of 35 falsification endpoints in weighted patients undergoing rhythm or rate control.

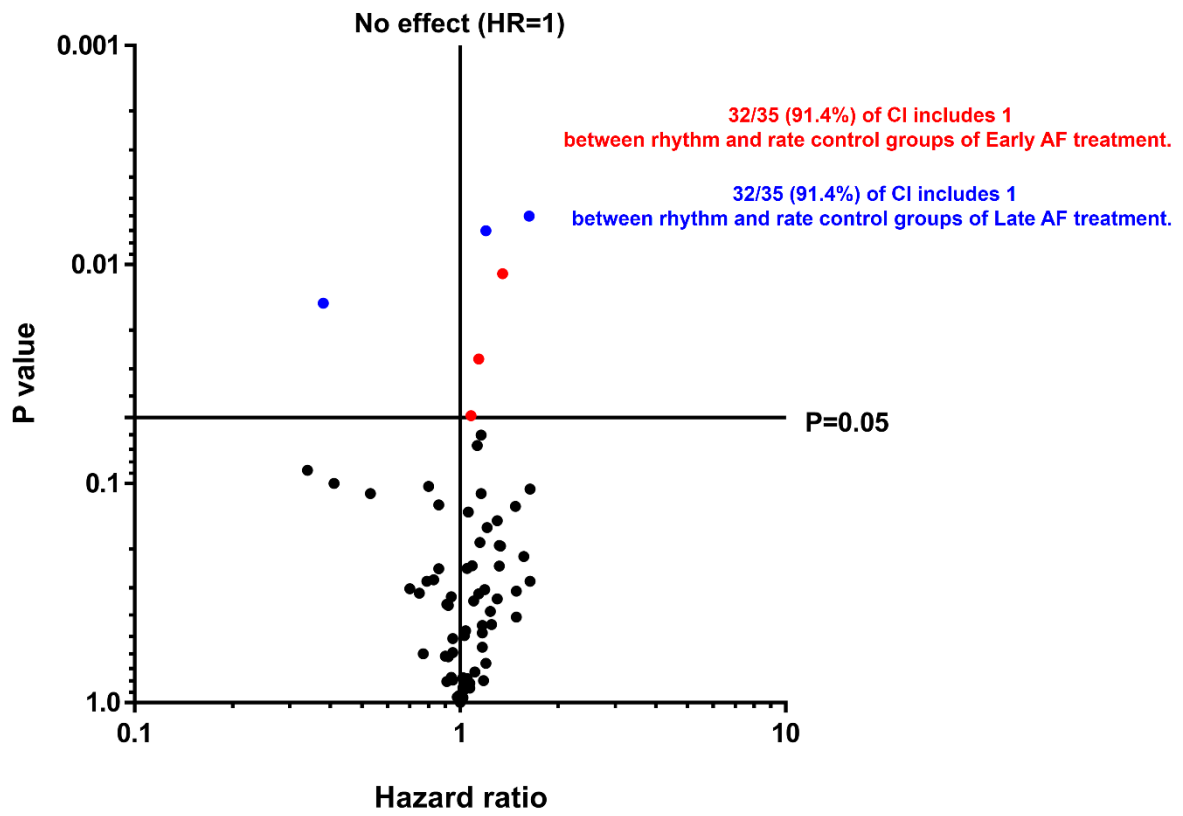

AF, atrial fibrillation; CI, confidence interval; HR, hazard ratio.
